# Supplementary material for: Photoinduced electron transfer in supramolecular donor–acceptor dyads of Zn corrphycene
Source: Royal Society of Chemistry journal article supplement (doi:10.1039/c3cp43795g), 2013-01-01
Supplement: c3cp43795g.pdf [file c3cp43795g.pdf]

Electronic Supplementary Information for

# Photoinduced Electron Transfer in Supramolecular Donor-Acceptor dyad of Zn Corrphycene

*Mamoru Fujitsuka, Hisashi Shimakoshi, Yui Tei, Kazumasa Noda, Sachiko Tojo, Yoshio Hisaeda,  
and Tetsuro Majima\**

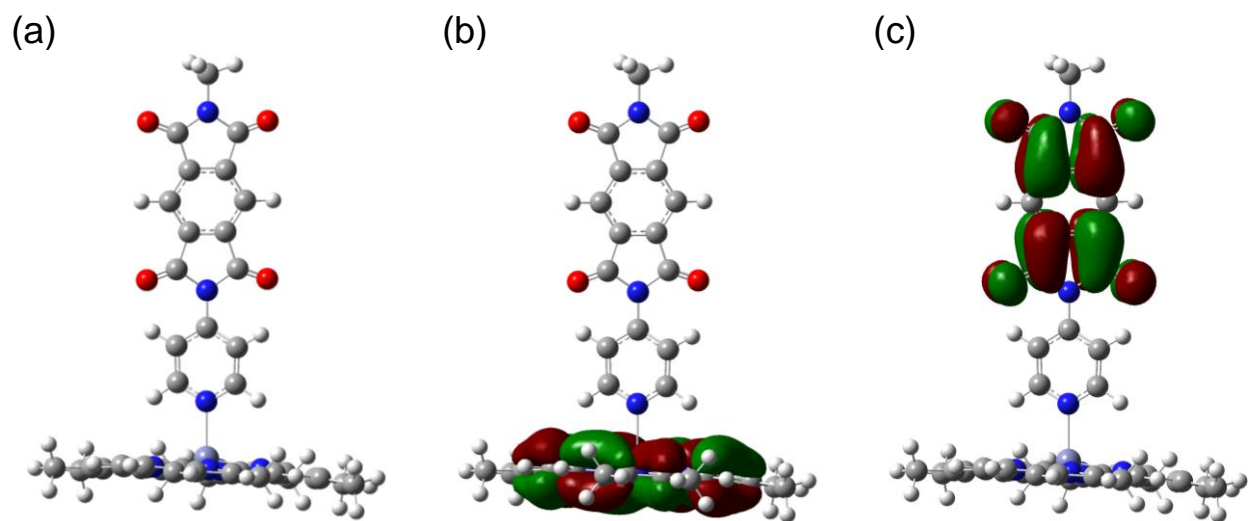

**Fig. S1** (a) Optimized structure, (b) HOMO, and (c) LUMO of PI-ZnCc calculated using DFT at B3LYP/6-31G(d) level. For simplicity of the calculation, alkyl groups of the compounds were reduced to methyl groups.

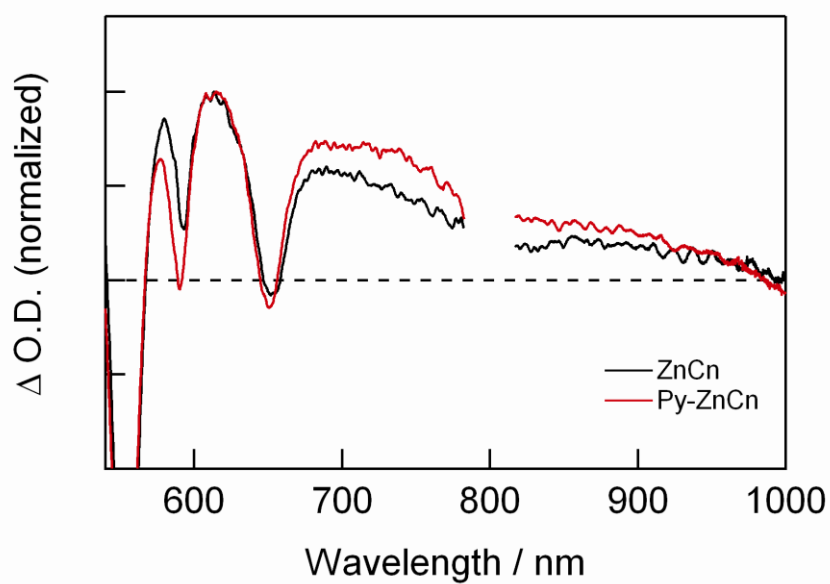

**Fig. S2** (a) Transient absorption spectra of ZnCn (0.37 mM) and Py-ZnCn (ZnCn: 0.37 mM, Py: 4.1 mM) in toluene at 2 ps after laser excitation during the laser flash photolysis using 560-nm femtosecond laser pulse.

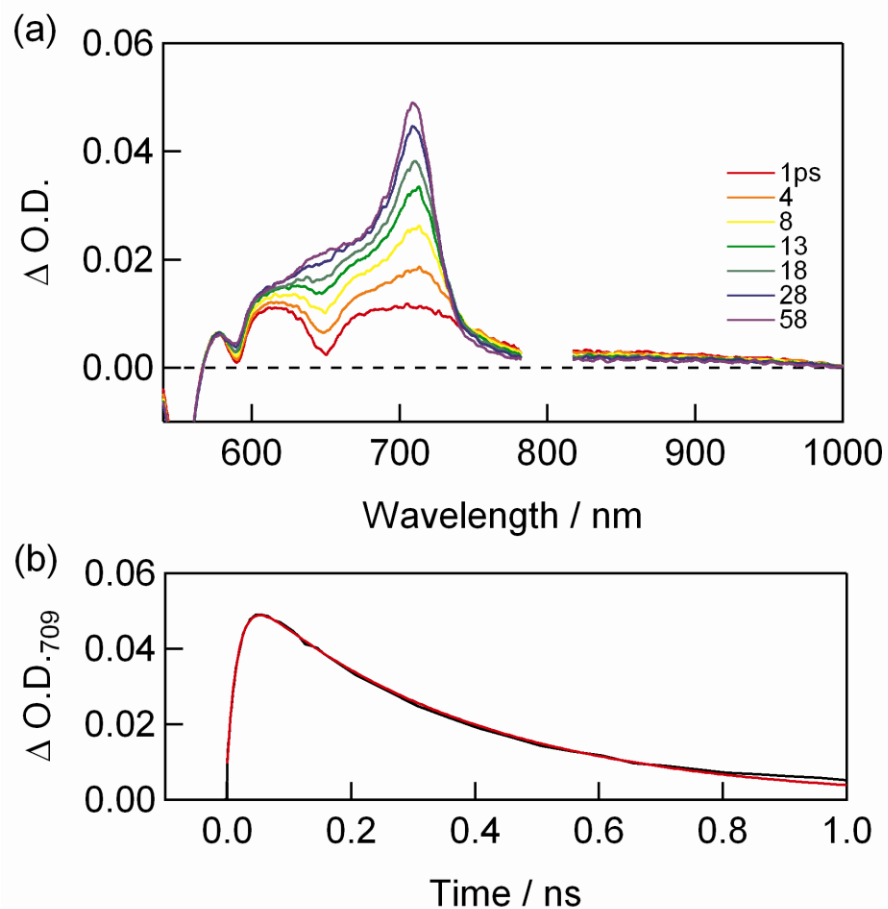

**Fig. S3** (a) Transient absorption spectra of PI-ZnCd (ZnCd: 0.37 mM, PI: 3.7 mM) in toluene during the laser flash photolysis using 560-nm femtosecond laser pulse for excitation. (b) Kinetic trace of  $\Delta O.D.$  at 709 nm during the laser flash photolysis. Red curve is a fitted curve.
